# Supplementary material for: Metabolic engineering ofZymomonas mobilisfor continuous co-production of bioethanol and poly-3-hydroxybutyrate (PHB)
Source: Royal Society of Chemistry journal article supplement (doi:10.1039/d1gc04522a), 2022-01-01
Supplement: d1gc04522a1.pdf [file d1gc04522a1.pdf]

**Table S1 Strains and plasmids used in this study.**

|                            | Description                                                                                                                                                                        | Source                             |
|----------------------------|------------------------------------------------------------------------------------------------------------------------------------------------------------------------------------|------------------------------------|
| <b>Plasmids</b>            |                                                                                                                                                                                    |                                    |
| pEZ15Asp                   | Shuttle vector contains <i>Z. mobilis</i> origin and <i>E. coli</i> origin p15A; Biobrick-compatible, <i>Spe</i> <sup>R</sup>                                                      | <a href="#">Yang et al., 2016b</a> |
| pEZ-Pt                     | pEZ15A containing a <i>phaCAB</i> operon from <i>C. necator</i> H16 driven by inducible promoter <i>Ptet</i> , <i>Spe</i> <sup>R</sup>                                             | This work                          |
| pEZ-Pg                     | pEZ15A containing <i>phaCAB</i> operon driven by <i>Pgap</i> , <i>Spe</i> <sup>R</sup>                                                                                             | This work                          |
| pEZ-Pg <sup>N1</sup>       | pEZ15A containing <i>ZMO1329</i> ( <i>ppnK</i> ) gene and <i>phaCAB</i> operon driven by promoter <i>Pgap</i> , <i>Spe</i> <sup>R</sup>                                            | This work                          |
| pEZ-Pg <sup>N2</sup>       | pEZ15A containing <i>ZMO0367</i> ( <i>zwf</i> ) gene and <i>phaCAB</i> operon driven by promoter <i>Pgap</i> , <i>Spe</i> <sup>R</sup>                                             | This work                          |
| pE39p-Pe <sup>EUP</sup>    | pEZ15A containing <i>ada</i> from <i>Dickeya zeae</i> and <i>adh2</i> gene from <i>Saccharomyces cerevisiae</i> driven by stronger promoter <i>Peno</i> , <i>Kana</i> <sup>R</sup> | This work                          |
| pL2R-Pt                    | The <i>Ptet</i> -driven <i>phaCAB</i> operon was inserted into ZM4 chromosome <i>ZMO0038</i> using pL2R editing plasmid, <i>Spe</i> <sup>R</sup>                                   | This work                          |
| pL2R-Pg                    | The <i>Pgap</i> -driven <i>phaCAB</i> operon was inserted into ZM4 chromosome <i>ZMO0038</i> using pL2R editing plasmid, <i>Spe</i> <sup>R</sup>                                   | This work                          |
| pL2R-Flo                   | pL2R with the deletion of a nucleotide thymine in <i>ZMO1082</i> result the integration of <i>ZMO1082</i> with <i>ZMO1083</i> , <i>Spe</i> <sup>R</sup>                            | This work                          |
| <b>Strains</b>             |                                                                                                                                                                                    |                                    |
| DH5α                       | <i>E. coli</i> for plasmid construction                                                                                                                                            | Lab stock                          |
| Trans110                   | <i>E. coli</i> for plasmid demethylation                                                                                                                                           | Lab stock                          |
| ZM4                        | <i>Zymomonas mobilis</i> subsp. <i>mobilis</i> ZM4 strain                                                                                                                          | Lab stock                          |
| ZM4Pt                      | <i>Z. mobilis</i> ZM4 containing plasmid pEZ-Pt, <i>Spe</i> <sup>R</sup>                                                                                                           | This work                          |
| ZM4Pg                      | <i>Z. mobilis</i> ZM4 containing plasmid pEZ-Pg, <i>Spe</i> <sup>R</sup>                                                                                                           | This work                          |
| ZM4Pg <sup>N1</sup>        | <i>Z. mobilis</i> ZM4 containing plasmid pEZ-Pg <sup>N1</sup> , <i>Spe</i> <sup>R</sup>                                                                                            | This work                          |
| ZM4Pg <sup>N2</sup>        | <i>Z. mobilis</i> ZM4 containing plasmid pEZ-Pg <sup>N2</sup> , <i>Spe</i> <sup>R</sup>                                                                                            | This work                          |
| ZMPt                       | <i>Ptet</i> -driven <i>phaCAB</i> operon inserted into ZM4 chromosome                                                                                                              | This work                          |
| ZMPg                       | <i>Pgap</i> -driven <i>phaCAB</i> operon inserted into ZM4 chromosome                                                                                                              | This work                          |
| ZMPt <sup>g</sup>          | ZMPt containing plasmid pEZ-Pg, <i>Spe</i> <sup>R</sup>                                                                                                                            | This work                          |
| ZMPg <sup>g</sup>          | ZMPg containing plasmid pEZ-Pg, <i>Spe</i> <sup>R</sup>                                                                                                                            | This work                          |
| ZMPt <sup>N1</sup>         | ZMPt containing plasmid pEZ-Pg <sup>N1</sup> , <i>Spe</i> <sup>R</sup>                                                                                                             | This work                          |
| ZMPt <sup>N2</sup>         | ZMPt containing plasmid pEZ-Pg <sup>N2</sup> , <i>Spe</i> <sup>R</sup>                                                                                                             | This work                          |
| ZMPt <sup>EUP</sup>        | ZMPt containing plasmid pE39p-Pe <sup>EUP</sup> , <i>Kana</i> <sup>R</sup>                                                                                                         | This work                          |
| ZMPt <sup>N1-EUP</sup>     | ZMPt containing plasmids pEZ-Pg <sup>N1</sup> and pE39p-Pe <sup>EUP</sup> , <i>Spe</i> <sup>R</sup> , <i>Kana</i> <sup>R</sup>                                                     | This work                          |
| ZMPt <sup>N2-EUP</sup>     | ZMPt containing plasmids ZM4Pg <sup>N2</sup> and pE39p-Pe <sup>EUP</sup> , <i>Spe</i> <sup>R</sup> , <i>Kana</i> <sup>R</sup>                                                      | This work                          |
| ZMPt-Flo                   | Deletion of a nucleotide thymine in <i>ZMO1082</i> resulting in the integration of <i>ZMO1082</i> with <i>ZMO1083</i>                                                              | This work                          |
| ZMPt-Flo <sup>N1</sup>     | ZMPt-Flo containing plasmid pEZ-Pg <sup>N1</sup> , <i>Spe</i> <sup>R</sup>                                                                                                         | This work                          |
| ZMPt-Flo <sup>N2</sup>     | ZMPt-Flo containing plasmid pEZ-Pg <sup>N2</sup> , <i>Spe</i> <sup>R</sup>                                                                                                         | This work                          |
| ZMPt-Flo <sup>N1-EUP</sup> | ZMPt-Flo containing pEZ-Pg <sup>N1</sup> and pE39p-Pe <sup>EUP</sup> , <i>Spe</i> <sup>R</sup> , <i>Kana</i> <sup>R</sup>                                                          | This work                          |
| ZMPt-Flo <sup>N2-EUP</sup> | ZMPt-Flo containing pEZ-Pg <sup>N2</sup> and pE39p-Pe <sup>EUP</sup> , <i>Spe</i> <sup>R</sup> , <i>Kana</i> <sup>R</sup>                                                          | This work                          |

**Table S2 Primers used in this study. Font underlined indicates homology arms.**

| Name                                   | Sequence (5'—3')                                            | Usage                              |
|----------------------------------------|-------------------------------------------------------------|------------------------------------|
| <b>Primers for construction of PHB</b> |                                                             |                                    |
| <i>Ptet</i> -CAB-F                     | <u>GATCTCCCGGATCC</u> ATGGCCACCGCAAAG                       | Clone and expression               |
| <i>Pgap</i> -CAB-F                     | <u>CTTAATAAGTTAGGAGAATAAAC</u> ATGGCCACCGCAAAG              | Clone and expression               |
| <i>phaC</i> -R                         | <u>CTTACTTTCTCTAGATTATGG</u> TTAGGCTTTAGCTTTAACATAACGACCAG  | Clone and expression               |
| <i>phaA</i> -F                         | <u>CCATAATCTAGAGAAAG</u> TAAGCACATGACCGATGTTGTCATTGTCTCTG   | Clone and expression               |
| <i>phaA</i> -R                         | <u>GTGCTTACTTTCTCTAGATTATGG</u> TATTGCGTTCAACGGCCAAAG       | Clone and expression               |
| <i>phaB</i> -F                         | <u>CTAGAGAAAGTAAGCAC</u> ATGACCCAACGTATTGCCTATC             | Clone and expression               |
| <i>phaB</i> -R                         | <u>GGCCGCTACTAGTTT</u> AACCCATATGCAAGCCACCATTC              | Clone and expression               |
| <i>ppnK</i> -R                         | <u>TCCTTTCTCCTCTTTTT</u> AACATAAGCGAAATGTTTCGCG             | Clone and expression               |
| <i>ppnK-phaC</i> -F                    | <u>GTAAAAAGAGGAGAAAGGATCTCC</u> ATGGCCACCGCAAAG             | Clone and expression               |
| <i>zwf</i> -F                          | ATGACAAATACCGTTTTCGACGATG                                   | Clone and expression               |
| <i>zwf</i> -R                          | <u>GAGATCCTTTCTCCTCTTTT</u> CAGTCATACCAAGTTACTCCATCAC       | Clone and expression               |
| <i>zwf-phaC</i> -F                     | <u>AAAGAGGAGAAAGGATCTCC</u> ATGGCCACCGCAAAGG                | Clone and expression               |
| <i>Peno</i> -F                         | TGCTATACTCCAGTTACTCAATACGTAACAATAATCAGTTTATCCTAAC           | Clone and expression               |
| <i>Peno</i> -R                         | <u>ATCGAAACCTTTCTT</u> AAAATCTTTTAGACGAG                    | Clone and expression               |
| <i>Peno-ada</i> -F                     | <u>AAAGATTTTAAGAAAGGTTT</u> CGATATGGAACATAGCGTTATTGAACC     | Clone and expression               |
| <i>ada</i> -R                          | <u>CTTCTAGACCCTGTGATTT</u> AAGCAATACGAAACATATCAACCAAAAC     | Clone and expression               |
| <i>adh2</i> -F                         | <u>ATCACAGGGTCTAGAAGGAG</u> GTGCAAAATGAGCATTCCGGAAACCC      | Clone and expression               |
| <i>adh2</i> -R                         | <u>CGAGATCTATGGGACGTTATTT</u> AGAGGTATCAACAACATAACGACC      | Clone and expression               |
| <b>Primers for gene editing</b>        |                                                             |                                    |
| 0038-gr1-F                             | GAAAGCGTCCAGCAAAATACGCCTTCTATTGATGAA                        | 0038gRNA-F                         |
| 0038-gr1-R                             | GAACTTCATCAATAGAAGGCGTATTTGCTGGACGC                         | 0038gRNA-R                         |
| 0038-up-F                              | <u>CACCAGCTCACCGTCTGCTTTTT</u> GCCGACAAAGCG                 | Generate pL2R- <i>phaCAB</i> -0038 |
| 0038-up-R                              | TCACGCCCGACGCCAGACGGGATTAGAAATTTTGTCG                       | Generate pL2R- <i>phaCAB</i> -0038 |
| 0038-up- <i>Ptet</i> -F                | <u>GGCGTCGGGCGTGATTA</u> AGACCCACTTTCACATTTAAGTTGTTTTCTAATC | Generate pL2R- <i>phaCAB</i> -0038 |
| <i>phaB</i> -down-R                    | <u>CGTCTATCTGAATATTTA</u> ACGATTAACCCATATGCAAGCCACC         | Generate pL2R- <i>phaCAB</i> -0038 |
| 0038-down-F                            | <u>TCGTTAAATATTCAGATAG</u> ACGGAGATAATAAACGGGAGAGAGGTCG     | Generate pL2R- <i>phaCAB</i> -0038 |
| 0038-down-R                            | <u>GCTCGAGATCTGATATCA</u> CTCAACAGATCAACC                   | Generate pL2R- <i>phaCAB</i> -0038 |
| 0038-up- <i>Pgap</i> -F                | <u>GGCGTCGGGCGTGAGTT</u> CGATCAACAACCCGAATCCTATC            | Generate pL2R- <i>phaCAB</i> -0038 |
| Flo-gr-F                               | GAAAGCTCTTATGGTGGTTGCTGTTCCGCTACCGCT                        | FlogRNA-F                          |
| Flo-gr-R                               | GAACAGCGGTAGCGGAACAGCAACCACCATAAGAGC                        | FlogRNA-R                          |
| Flo-up-F                               | <u>ACCAGCTCACCGTCTTT</u> AACTTTCATATCGGCGTACAAGAAGAAG       | Generate pL2R-Flo-401              |
| Flo-up-R                               | <u>AGCAACCACCATAAAGAG</u> CTGCAACGGTAATCAAGCAAAGCAATG       | Generate pL2R-Flo-401              |
| Flo-down-F                             | GCTCTTATGGTGGTTGCTGTTCCG                                    | Generate pL2R-Flo-401              |
| Flo-down-R                             | <u>GCTCGAGATCTGATATCA</u> CTGTACAGTCAAAAATGCAGACTAATTCACC   | Generate pL2R-Flo-401              |
| <b>Primers for gene detection</b>      |                                                             |                                    |
| 15A-fwd                                | GGCAAAGCCACCCTATTTTTAG                                      | Plasmid detection                  |
| 15A-rev                                | CACTTCACTGACACCCTCAT                                        | Plasmid detection                  |

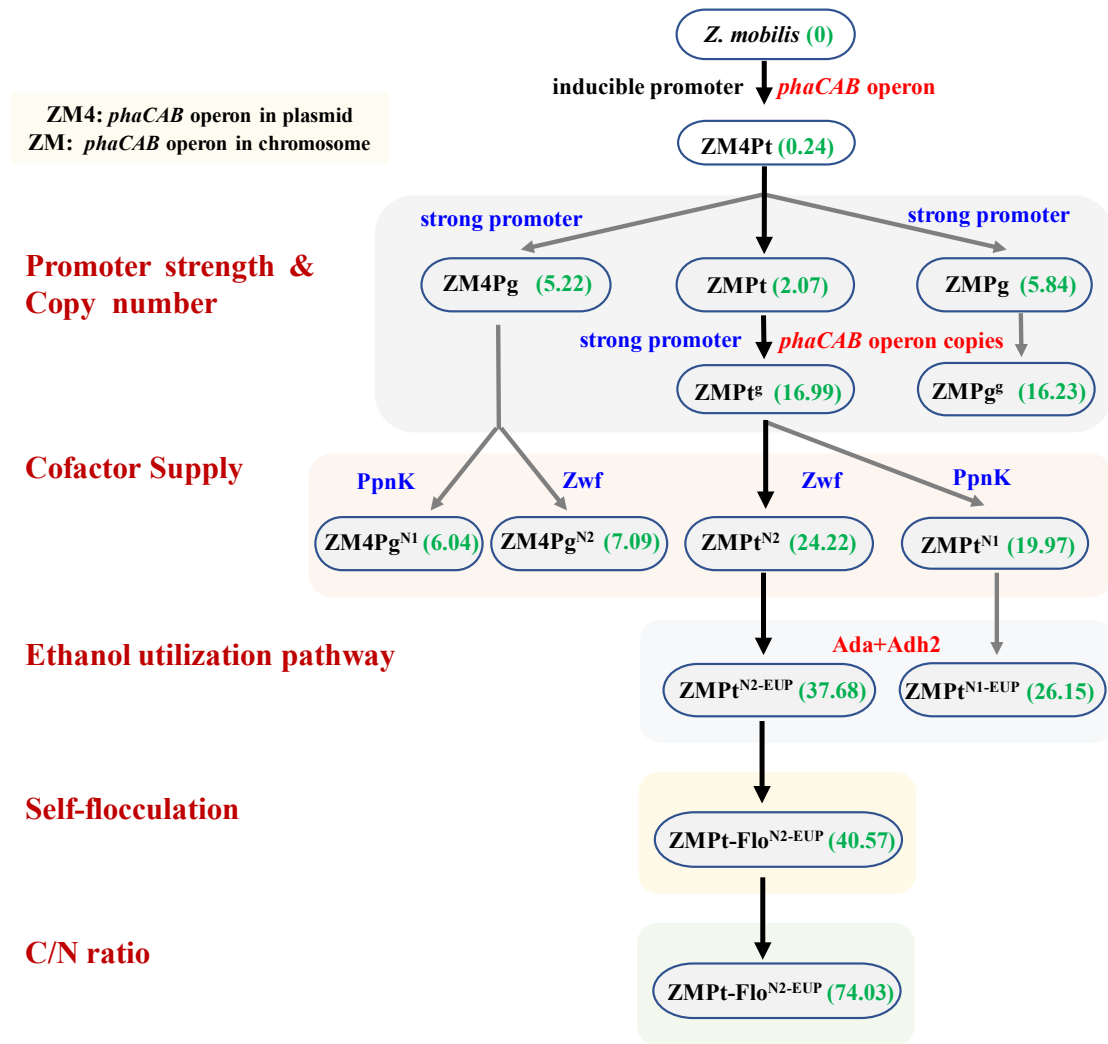

**Fig S1. Overview of the strain constructed in *Z. mobilis* for PHB production.** Native genes overexpressed or promoter replacement are shown in blue font, while heterologous genes are shown in red font. The PHB content of dry cell weight (%DCW) in recombinant *Z. mobilis* are shown in green font.
